# Supplementary material
Source: publisher figshare collection journal article supplement (https://acs.figshare.com/ndownloader/files/5141881)
Supplement: Supplementary file 1 [file 5141881]

# **Nitrogenous Educts Through Oxidative Amidation of Phenols: The Bimolecular Reaction**

Sylvain Canesi, Denis Bouchu and Marco A. Ciufolini\*

*Laboratoire de Synthèse et Méthodologie Organiques, CNRS UMR 5181; Université Claude Bernard Lyon 1 and Ecole Supérieure de Chimie, Physique et Electronique de Lyon, 43, Bd du 11 Novembre 1918, 69622 Villeurbanne, France, and Department of Chemistry, the University of British Columbia, 2036 Main Mall, Vancouver, BC V6T 1Z1, Canada*

**SUPPORTING INFORMATION**

**A. Experimental protocols.** Unless otherwise indicated, proton and  $^{13}\text{C}$  NMR spectra were recorded at 300 and 75 MHz, respectively, in  $\text{CDCl}_3$  solutions. Chemical shifts are reported in ppm on the  $\delta$  scale. Multiplicities are described as s (singlet), d (doublet), dd, ddd, etc. (doublet of doublets, doublet of doublets of doublets, etc.), t (triplet), q (quartet) m (multiplet), and further qualified as app (apparent) b (broad) c (complex). Coupling constants,  $J$ , are reported in Hz. Low- and high-resolution mass spectra ( $m/e$ ) were measured in the chemical ionization mode (CI, isobutane as the reagent gas).

**B. General procedure for oxidative amidation of phenols.** A solution of  $\text{PhI}(\text{OAc})_2$  ("DIB", 232.0 mg, 0.7 mmol, 1.2 equiv.) in  $(\text{CF}_3)_2\text{CHOH}$  ("HFIP", 0.5 mL) was added dropwise over 30 sec to a vigorously stirred solution of a phenol (0.6 mmol, 1 equiv.) in MeCN (2.0 mL) and HFIP (1.5 mL) kept at 15 °C (bath temperature). The mixture was stirred for 20 min, then it was concentrated. Silica gel chromatography of the residue, first with 1:1 AcOEt / Hexanes (removal of gross contaminants), and then with 5 - 10 % MeOH in  $\text{CH}_2\text{Cl}_2$ , provided the pure product.

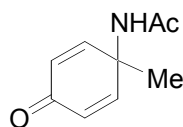

166.0871.

**Compound 11a:** Yield = 56%.  $^1\text{H}$ : 6.82 (d, 2H,  $J = 10.2$  Hz), 6.31 (br s, 1H), 6.19 (d, 2H,  $J = 10.2$  Hz), 1.91 (s, 3H), 1.43 (s, 3H).  $^{13}\text{C}$ : 185.5, 170.3, 152.5, 127.6, 52.5, 26.1, 23.1. HRMS: calc for  $\text{C}_9\text{H}_{12}\text{O}_2\text{N}_1$  ( $\text{MH}^+$ ): 166.0868; found:

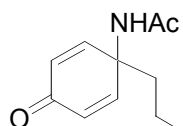

**Compound 11b:** Yield = 54%.  $^1\text{H}$ : 6.77 (d, 2H,  $J = 10.2$  Hz), 6.67 (br s, 1H), 6.24 (d, 2H,  $J = 10.2$  Hz), 1.96 (s, 3H), 1.69 (m, 2H), 1.22 (m, 2H), 0.84 (t, 3H,  $J = 7.2$  Hz).  $^{13}\text{C}$ : 185.8, 170.0, 151.3, 128.6, 55.9, 40.4, 23.2, 16.4, 13.9. HRMS: calc. for  $\text{C}_{11}\text{H}_{16}\text{O}_2\text{N}_1$  ( $\text{MH}^+$ ): 194.1181; found: 194.1182

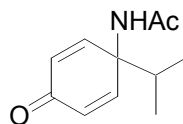

**Compound 11c:** Yield = 62%.  $^1\text{H}$ : 6.81 (d, 2H,  $J = 10.2$  Hz), 6.31 (br s, 1H), 6.26 (d, 2H,  $J = 10.2$  Hz), 2.21 (h, 1H,  $J = 7.0$  Hz), 1.91 (s, 3H), 0.89 (d, 6H,  $J = 7.0$  Hz).  $^{13}\text{C}$ : 185.8, 170.1, 149.8, 129.3, 58.9, 34.7, 23.3, 16.9.

HRMS: calc for  $\text{C}_{11}\text{H}_{16}\text{O}_2\text{N}_1$  ( $\text{MH}^+$ ): 194.1181; found: 194.1181.

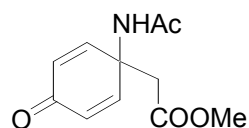

**Compound 11d:** Yield = 58%.  $^1\text{H}$ : 6.95 (d, 2H,  $J = 10.2$  Hz), 6.80 (br s, 1H), 6.29 (d, 2H,  $J = 10.2$  Hz), 3.72 (s, 3H), 2.76 (s, 2H), 1.97 (s, 3H).  $^{13}\text{C}$ : 184.7, 170.2, 170.1, 148.4, 128.8, 53.2, 52.3, 42.2, 23.5.

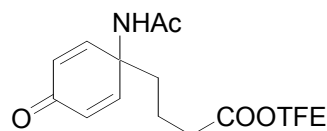

**Compound 11e:** Yield = 57%.  $^1\text{H}$ : 6.84 (d, 2H,  $J = 10.2$  Hz), 6.43 (br s, 1H), 6.28 (d, 2H,  $J = 10.2$  Hz), 4.47 (q, 2H,  $J = 8.3$  Hz), 2.41 (t, 2H,  $J = 6.8$  Hz), 1.94 (s, 3H), 1.83 (m, 2H), 1.62 (m, 2H).

$^{13}\text{C}$ : 185.4, 171.4, 170.0, 150.0, 129.2, 60.5(q), 55.6, 37.2, 32.7, 23.4, 18.4.

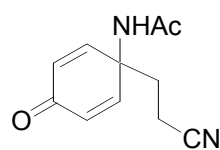

**Compound 11f:** Yield = 67%.  $^1\text{H}$ : 6.89 (d, 2H,  $J = 10.2$  Hz), 6.70 (br s, 1H), 6.31 (d, 2H,  $J = 10.2$  Hz), 2.26 (br, 4H), 1.91 (s, 3H).  $^{13}\text{C}$ : 184.7, 170.5, 148.0, 130.0, 118.7, 55.0, 32.4, 23.4, 11.9.

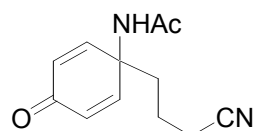

**Compound 11g:** Yield = 71%.  $^1\text{H}$ : 6.91 (br s, 1H), 6.82 (d, 2H,  $J = 10.2$  Hz), 6.26 (d, 2H,  $J = 10.2$  Hz), 2.31 (t, 2H,  $J = 6.8$  Hz), 1.97 (m, 2H), 1.89 (s, 3H), 1.52 (m, 2H).  $^{13}\text{C}$ : 185.3, 170.2, 149.9, 129.1, 118.8, 55.3, 36.1, 23.2, 19.2, 16.8.

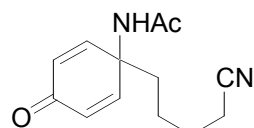

**Compound 11h:** Yield = 71%.  $^1\text{H}$ : 6.86 (d, 2H,  $J = 10.2$  Hz), 6.60 (br s, 1H), 6.26 (d, 2H,  $J = 10.2$  Hz), 2.31 (t, 2H,  $J = 7.2$  Hz), 1.92 (s, 3H), 1.87 (m, 2H), 1.60 (q, 2H,  $J = 7.2$  Hz), 1.35 (m, 2H).  $^{13}\text{C}$ : 185.4, 170.1, 150.2, 129.0, 119.2, 55.7, 36.9, 25.0, 23.4, 22.4, 16.8.

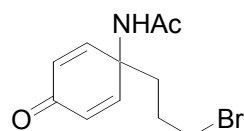

**Compound 11j:** Yield = 65%.  $^1\text{H}$ : 6.81 (d, 2H,  $J = 10.2$  Hz), 6.37 (br s, 1H), 6.30 (d, 2H,  $J = 10.2$  Hz), 3.35 (t, 2H,  $J = 6.0$  Hz), 2.01 (m, 2H), 1.96 (s, 3H), 1.73 (m, 2H).  $^{13}\text{C}$ : 185.3, 170.0, 149.9, 129.4, 55.5, 36.4,

32.8, 26.3, 23.5.

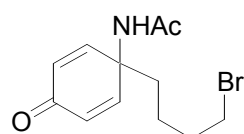

**Compound 11k:** Yield = 72%.  $^1\text{H}$ : 6.84 (d, 2H,  $J = 10.2$  Hz), 6.68 (br s, 1H), 6.26 (d, 2H,  $J = 10.2$  Hz), 3.32 (t, 2H,  $J = 6.8$  Hz), 1.91 (s, 3H), 1.80 (m, 4H), 1.37 (m, 2H).  $^{13}\text{C}$ : 185.6, 170.1, 150.6, 128.9, 55.8, 37.0,

32.9, 32.1, 23.3, 21.7.

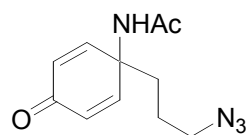

**Compound 11l:** Yield = 42%.  $^1\text{H}$ : 6.82 (d, 2H,  $J = 10.2$  Hz), 6.29 (d, 2H,  $J = 10.2$  Hz), 5.89. (br s, 1H), 3.31 (t, 2H,  $J = 6.4$  Hz), 1.98 (m, 2H, overlapping a s, 3H), 1.47 (m, 2H).  $^{13}\text{C}$ : 185.4, 170.1, 150.0, 129.2, 55.6, 50.9, 34.9, 23.4, 22.9.

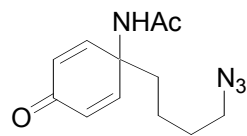

**Compound 11m:** Yield = 49%.  $^1\text{H}$ : 6.79 (d, 2H,  $J = 10.2$  Hz), 6.25 (br s, 1H), 6.24 (d, 2H,  $J = 10.2$  Hz), 3.20 (t, 2H,  $J = 7.0$  Hz), 1.91 (s, 3H), 1.78 (m, 2H), 1.47 (quintuplet, 2H,  $J = 7.0$  Hz), 1.25 (m, 2H).  $^{13}\text{C}$ : 185.6, 170.2, 150.7, 128.8, 55.8, 50.8, 37.4, 28.4, 23.2, 20.4.

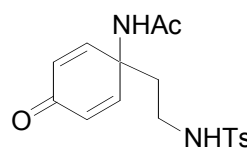

**Compound 11n:** Yield = 53%.  $^1\text{H}$ : 7.62 (d, 2H,  $J = 7.9$  Hz), 7.24 (d, 2H,  $J = 7.9$  Hz), 6.98 (br s, 1H), 6.84 (d, 2H,  $J = 9.8$  Hz), 6.21 (d, 2H,  $J = 9.8$  Hz), 5.83 (br s, 1H), 2.83 (br m, 2H), 2.38 (s, 3H), 2.03 (br m, 2H), 1.91 (s, 3H).  $^{13}\text{C}$ : 185.6, 170.8, 150.4, 143.8, 136.1, 129.8, 128.9, 126.9, 54.8, 38.2, 37.7, 23.3, 21.5.

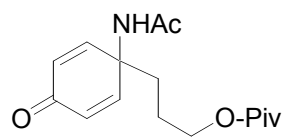

**Compound 11o:** Yield = 67%.  $^1\text{H}$ : 6.80 (d, 2H,  $J = 10.2$  Hz), 6.30 (d, 2H,  $J = 10.2$  Hz), 6.21 (br s, 1H), 3.99 (t, 2H,  $J = 6.0$  Hz), 1.95 (s, 3H), 1.88 (m, 2H), 1.53 (m, 2H), 1.16 (s, 9H).  $^{13}\text{C}$ : 185.4, 178.4, 169.9, 150.1, 129.1, 63.3, 55.5, 38.6, 34.2, 27.0, 23.3, 22.6. **HRMS**: calc. for  $\text{C}_{16}\text{H}_{24}\text{O}_4\text{N}_1$  ( $\text{MH}^+$ ): 294.1705; found 294.1705

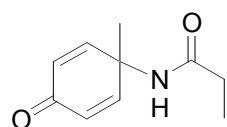

**Compound 18:** Yield = 52%.  $^1\text{H}$ : 6.86 (d, 2H,  $J = 10.2$  Hz), 6.37 (br s, 1H), 6.21 (d, 2H,  $J = 10.2$  Hz), 2.18 (q, 1H,  $J = 7.5$  Hz), 1.45 (s, 9H), 1.08 (t, 3H,  $J = 7.5$  Hz).  $^{13}\text{C}$ : 185.3, 173.6, 152.3, 127.6, 52.3, 29.3, 26.2, 9.3.

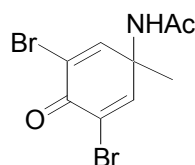

**Compound 20:** Yield = 24%.  $^1\text{H}$  ( $\text{MeOH}-d_4$ ): 7.43 (s, 2H), 1.94 (s, 3H), 1.43 (s, 3H).  $^{13}\text{C}$  ( $\text{MeOH}-d_4$ ): 172.4, 171.6, 153.9, 119.8, 56.5, 23.6, 21.1.

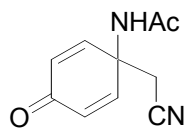

**Compound 22:** Yield = 31%.  $^1\text{H}$  (acetone- $d_6$ ): 7.06 (d, 2H,  $J = 10.2$  Hz), 6.29 (d, 2H,  $J = 10.2$  Hz), 3.15 (s, 2H), 1.91 (s, 3H).  $^{13}\text{C}$  (acetone- $d_6$ ): 184.8, 171.5, 147.6, 130.3, 116.5, 54.0, 27.0, 23.3.

**C. Procedure for the cyclization of compounds 11j and 11k.** A solution of **11j** or **11k** (0.2 mmol) in dry THF (2.0 mL) was treated with solid NaH (1.1 eq.) and stirred at room temperature and under Ar. After 10 (**11j**) / 60 (**11k**) minutes, TLC showed complete conversion. The mixture was quenched with 2 drops of a saturated aqueous solution of  $\text{NH}_4\text{Cl}$  and concentrated, and the aqueous residue was extracted with  $\text{CHCl}_3$  (3 x 2 mL). The combined extracts were filtered and concentrated to give essentially pure product **27** and **28** as slightly yellow oils.

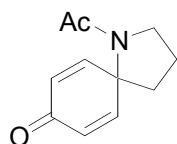

**Compound 27:** 1:1 ratio of amide rotamers. Yield = 91%.  $^1\text{H}$ : 6.89 (d, 1H,  $J = 10.2$  Hz) & 6.76 (d, 1H,  $J = 10.2$  Hz), 6.30 (d, 1H,  $J = 10.2$  Hz) & 6.23 (d, 1H,  $J = 10.2$  Hz), 3.81 (app t, 1H,  $J = 6.6$  Hz) & 3.72 (app t, 1H,  $J = 6.6$  Hz), 2.23 (app t, 1H,  $J = 6.6$  Hz) & 1.08 (c m, 3 H), 2.07 (s, 1.5H) & 1.89 (s, 1.5H).

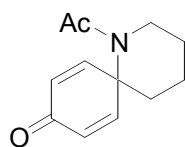

**Compound 28:** Yield = 91%.  $^1\text{H}$ : 7.01 (d, 2H,  $J = 10.2$  Hz), 6.19 (d, 2H,  $J = 10.2$  Hz), 3.58 (app t, 2H,  $J = 5.7$  Hz), 2.08 (s, 3H), 1.80 (m, 2H), 1.63 (m, 4H).  $^{13}\text{C}$ : 185.3, 171.8, 152.0, 125.9, 56.8, 38.2, 23.9, 23.2 (two overlapping signals), 19.5.
